# Supplementary material for: Prognostic Role and Clinical Significance of Tumor-Infiltrating Lymphocyte (TIL) and Programmed Death Ligand 1 (PD-L1) Expression in Triple-Negative Breast Cancer (TNBC): A Systematic Review and Meta-Analysis Study
Source: PubMed Central journal article supplement (PMC7554852; doi:10.3390/diagnostics10090704), 2020-09-17
Supplement: diagnostics-10-00704-s001.pdf [file diagnostics-10-00704-s001.pdf]

Supplementary

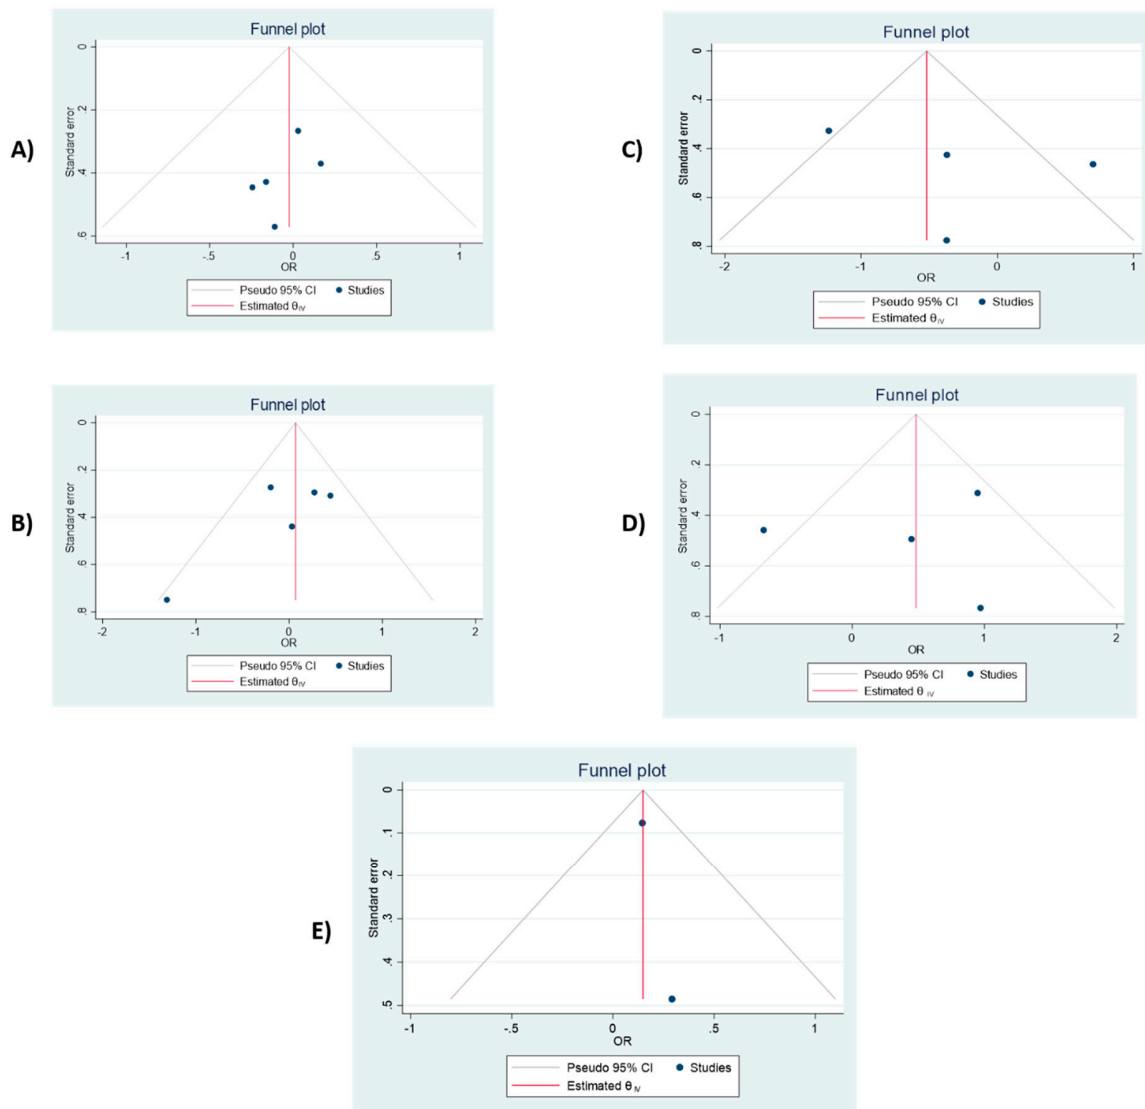

**Figure S1.** Funnel plots based on PD-L1 expression for tumor size(A), tumor stage (B), lymph node metastasis(C), tumor grade(D), Ki67 (E).

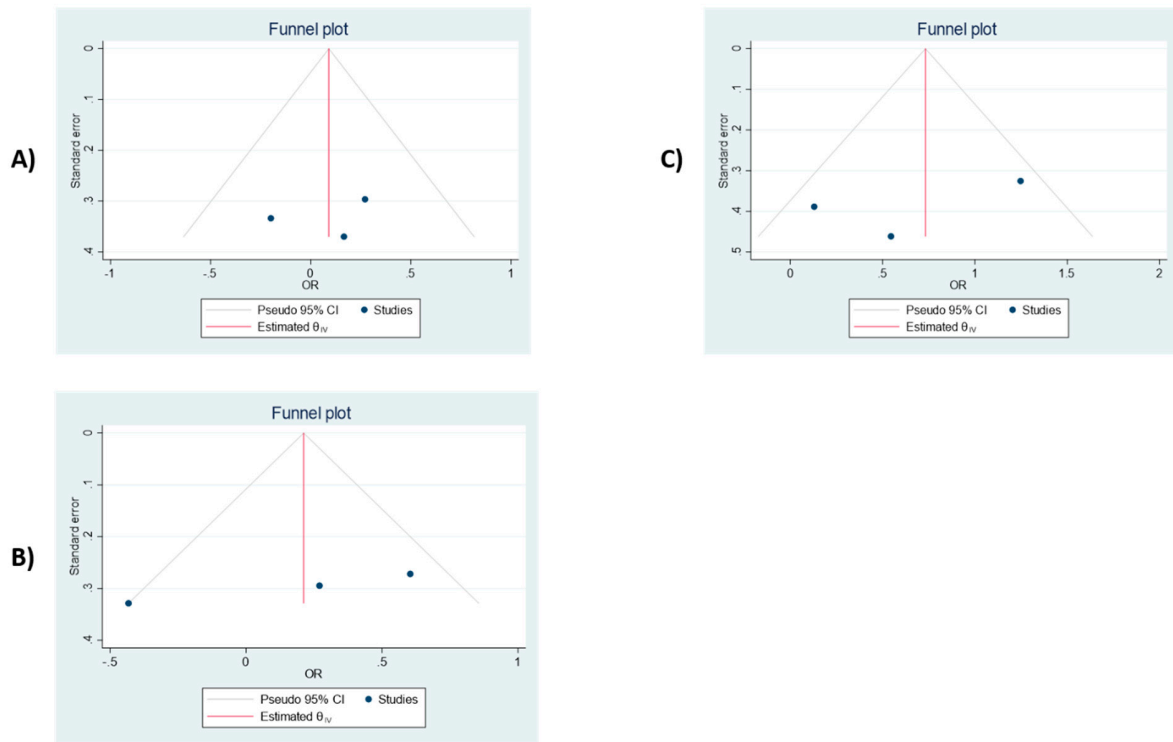

**Figure S2.** Funnel plots based on TILsfortumor size(A), tumor stage (B),lymph node metastasis(C).
